# Supplementary material for: Medicinal Plants for Treating Musculoskeletal Disorders among Karen in Thailand
Source: PubMed Central journal article supplement (PMC7412036; doi:10.3390/plants9070811), 2020-06-28
Supplement: plants-09-00811-s001.pdf [file plants-09-00811-s001.pdf]

### Supplementary Data

**Table S1** The reference and number of pseudo informants of medicinal plants used to treat Musculoskeletal disorders (MSDs) among the Karen ethnic minority in Thailand.

| Scientific Name                                             | Family        | No. Pseudo informants | Part of Use  | Preparation        | Application          | ICPC-2 2nd Level                                       | Reference |
|-------------------------------------------------------------|---------------|-----------------------|--------------|--------------------|----------------------|--------------------------------------------------------|-----------|
| <i>Acanthus montanus</i> (Nees) T. Anderson                 | ACANTHACEAE   | 1                     | Leaves       | Decoction          | Oral ingestion       | Muscle pain                                            | [1]       |
| <i>Acmella oleracea</i> (L.) R.K. Jansen                    | ASTERACEAE    | 1                     | Roots        | Alcoholic infusion | Oral ingestion       | Muscle pain                                            | [1]       |
| <i>Ageratina adenophora</i> (Spreng.) R.M. King and H. Rob. | ASTERACEAE    | 1                     | Leaves       | Burning            | Poultices            | Muscle pain                                            | [2]       |
| <i>Ageratum conyzoides</i> L.                               | ASTERACEAE    | 1                     | Whole plants | Decoction          | Oral ingestion       | Back symptom/complaint, Flank/axilla symptom/complaint | [3]       |
| <i>Aglaia lawii</i> (Wight) C.J. Saldanha                   | MELIACEAE     | 1                     | Leaves       | Decoction          | Bath, oral ingestion | Muscle pain                                            | [4]       |
| <i>Alpinia galanga</i> (L.) Willd.                          | ZINGIBERACEAE | 1                     | Roots        | Decoction          | Oral ingestion       | Back symptom/complaint, Flank/axilla symptom/complaint | [5]       |
| <i>Alpinia roxburghii</i> Sweet                             | ZINGIBERACEAE | 1                     | Roots        | Decoction          | Bath, oral ingestion | Muscle pain                                            | [2]       |

|                                                 |               |   |                     |                                     |                               |                                                        |         |
|-------------------------------------------------|---------------|---|---------------------|-------------------------------------|-------------------------------|--------------------------------------------------------|---------|
| <i>Alstonia macrophylla</i><br>Wall. ex G. Don  | APOCYNACEAE   | 1 | Bark                | Water infusion                      | Oral ingestion                | Muscle pain                                            | [6]     |
| <i>Alstonia rostrata</i><br>C.E.C. Fisch.       | APOCYNACEAE   | 1 | Bark                | Decoction, water infusion           | Oral ingestion                | Muscle pain                                            | [2]     |
| <i>Anredera cordifolia</i> (Ten.)<br>Steenis    | BASELLACEAE   | 1 | Bulbil              | Cook                                | Eaten as food                 | Back symptom/complaint, Flank/axilla symptom/complaint | [3]     |
| <i>Antidesma bunius</i> (L.)<br>Spreng.         | EUPHORBIACEAE | 1 | Roots               | Decoction                           | Oral ingestion                | Back symptom/complaint, Flank/axilla symptom/complaint | [5]     |
| <i>Asparagus filicinus</i> Buch.-Ham. ex D. Don | ASPARAGACEAE  | 2 | Roots, whole plants | Decoction                           | Bath, oral ingestion          | Muscle pain                                            | [1,5]   |
| <i>Baccaurea ramiflora</i> Lour.                | EUPHORBIACEAE | 1 | Roots               | Decoction                           | Oral ingestion                | Back symptom/complaint, Flank/axilla symptom/complaint | [5]     |
| <i>Betula alnoides</i><br>Buch.-Ham. ex D. Don  | BETULACEAE    | 4 | Bark, leaves        | Alcoholic infusion, decoction, none | Eaten as food, oral ingestion | Flank/axilla symptom/complaint, Muscle pain            | [2,6,7] |
| <i>Biancaea sappan</i> (L.) Tod.                | LEGUMINOSAE   | 1 | Stems               | Decoction                           | Oral ingestion                | Back symptom/complaint, Flank/axilla symptom/complaint | [3]     |
| <i>Bistorta paleacea</i><br>(Wall. ex           | POLYGONACEAE  | 2 | Roots               | Decoction                           | Oral ingestion                | Back symptom/complaint                                 | [3]     |

|                                                                  |                      |   |                                   |                                     |                                              |                                                                                                                     |       |
|------------------------------------------------------------------|----------------------|---|-----------------------------------|-------------------------------------|----------------------------------------------|---------------------------------------------------------------------------------------------------------------------|-------|
| Hook.f.) Yonek.<br>and H. Ohashi                                 |                      |   |                                   |                                     |                                              | int,<br>Bursitis/tendinitis<br>/synovitis NOS,<br>Flank/axilla<br>symptom/compla<br>int                             |       |
| <i>Blumea<br/>balsamifera</i> (L.)<br>DC.                        | ASTERACEAE           | 1 | Leaves,<br>roots, whole<br>plants | Burning,<br>decoction,<br>grind     | Oral<br>ingestion,<br>poultices,<br>steaming | Back<br>symptom/compla<br>int, Flank/axilla<br>symptom/compla<br>int, Muscle pain,<br>Sprain/strain of<br>joint NOS | [2,6] |
| <i>Boehmeria<br/>glomerulifera</i><br>Miq.                       | URTICACEAE           | 1 | Roots                             | Decoction                           | Oral<br>ingestion                            | Muscle pain                                                                                                         | [4]   |
| <i>Brachypterum<br/>scandens</i><br>(Roxb.) Miq.                 | LEGUMINOSAE          | 1 | Stems                             | Decoction                           | Oral<br>ingestion                            | Muscle pain                                                                                                         | [8]   |
| <i>Buddleja asiatica</i><br>Lour.                                | SCROPHULARIAC<br>EAE | 4 | Leaves                            | Decoction                           | Oral<br>ingestion                            | Flank/axilla<br>symptom/compla<br>int, Leg/thigh<br>symptom/compla<br>int                                           | [6]   |
| <i>Canscora<br/>andrographioides</i><br>Griff. ex C.B.<br>Clarke | GENTIANACEAE         | 1 | Whole<br>plants                   | Decoction                           | Oral<br>ingestion                            | Muscle pain                                                                                                         | [2]   |
| <i>Cassytha<br/>filiformis</i> L.                                | LAURACEAE            | 2 | Stems,<br>whole plants            | Alcoholic<br>infusion,<br>decoction | Oral<br>ingestion                            | Muscle pain                                                                                                         | [2,3] |
| <i>Celastrus<br/>paniculatus</i><br>Willd.                       | CELASTRACEAE         | 1 | Aerial parts                      | Decoction                           | Oral<br>ingestion                            | Muscle pain                                                                                                         | [7]   |

|                                                                 |                    |   |                                             |                        |                                             |                                                                                   |       |
|-----------------------------------------------------------------|--------------------|---|---------------------------------------------|------------------------|---------------------------------------------|-----------------------------------------------------------------------------------|-------|
| <i>Centella asiatica</i><br>(L.) Urb.                           | APIACEAE           | 2 | Leaves,<br>whole plants                     | Decoction,<br>none     | Eaten as<br>food, oral<br>ingestion         | Back<br>symptom/compla<br>int, Flank/axilla<br>symptom/compla<br>int, Muscle pain | [3,5] |
| <i>Chloranthus<br/>erectus</i> (Buch.-<br>Ham.) Verdc.          | CHLORANTHACE<br>AE | 1 | Roots                                       | Decoction              | Oral<br>ingestion                           | Flank/axilla<br>symptom/compla<br>int                                             | [9]   |
| <i>Chromolaena<br/>odorata</i> (L.)<br>R.M. King and<br>H. Rob. | ASTERACEAE         | 2 | Roots, stems                                | Decoction              | Oral<br>ingestion                           | Muscle pain                                                                       | [2,6] |
| <i>Cissus discolor</i><br>Blume                                 | VITACEAE           | 1 | Roots                                       | Decoction              | Oral<br>ingestion                           | Muscle pain                                                                       | [6]   |
| <i>Citrus medica</i> L.                                         | RUTACEAE           | 1 | Leaves                                      | Decoction              | Oral<br>ingestion                           | Muscle pain                                                                       | [2]   |
| <i>Clausena<br/>excavata</i><br>Burm.f.                         | RUTACEAE           | 1 | Inflorescence<br>s, leaves,<br>whole plants | Burning,<br>cook, none | Eaten as<br>food,<br>poultices,<br>steaming | Back<br>symptom/compla<br>int, Flank/axilla<br>symptom/compla<br>int, Muscle pain | [6]   |
| <i>Clematis<br/>smilacifolia</i><br>Wall.                       | RANUNCULACEA<br>E  | 1 | Stems                                       | Decoction              | Oral<br>ingestion                           | Muscle pain                                                                       | [2]   |
| <i>Clerodendrum<br/>disparifolium</i><br>Blume                  | LAMIACEAE          | 1 | Leaves                                      | Grind                  | Poultices                                   | Muscle<br>symptom/compla<br>int NOS                                               | [4]   |
| <i>Clerodendrum<br/>indicum</i> (L.)<br>Kuntze                  | LAMIACEAE          | 1 | Inflorescence<br>s, leaves                  | Decoction              | Oral<br>ingestion                           | Muscle pain                                                                       | [10]  |
| <i>Cnestis palala</i><br>(Lour.) Merr.                          | CONNARACEAE        | 1 | Roots                                       | Decoction              | Oral<br>ingestion                           | Muscle pain                                                                       | [6]   |
| <i>Codariocalyx<br/>motorius</i><br>(Houtt.) H.<br>Ohashi       | LEGUMINOSAE        | 1 | Roots                                       | Decoction              | Oral<br>ingestion                           | Muscle pain                                                                       | [6]   |

|                                                                                                         |                |   |                     |                |                           |                                                                     |          |
|---------------------------------------------------------------------------------------------------------|----------------|---|---------------------|----------------|---------------------------|---------------------------------------------------------------------|----------|
| <i>Coix lacryma-jobi</i> L. var. <i>monilifer</i> Watt                                                  | POACEAE        | 2 | Whole plants, roots | Decoction      | Oral ingestion            | Back symptom/complaint, Flank/axilla symptom/complaint, Muscle pain | [3]      |
| <i>Crateva religiosa</i> G. Forst.                                                                      | CAPPARACEAE    | 1 | Leaves              | Grind          | Poultices                 | Sprain/strain of ankle                                              | [6]      |
| <i>Cratoxylum formosum</i> (Jacq.) Benth. and Hook.f. ex Dyer subsp. <i>pruniflorum</i> (Kurz) Gogelein | HYPERICACEAE   | 1 | Roots, stems        | Decoction      | Oral ingestion            | Muscle pain                                                         | [1]      |
| <i>Crinum asiaticum</i> L.                                                                              | AMARYLLIDACEAE | 3 | Leaves              | Burning        | Oral ingestion, poultices | Muscle pain, Sprain/strain of joint NOS                             | [1,8,11] |
| <i>Croton kongensis</i> Gagnep.                                                                         | EUPHORBIACEAE  | 2 | Leaves, roots       | Decoction      | Oral ingestion            | Muscle pain                                                         | [9]      |
| <i>Croton mangelong</i> Y.T. Chang                                                                      | EUPHORBIACEAE  | 1 | Leaves              | Decoction      | Oral ingestion            | Muscle pain                                                         | [1]      |
| <i>Curcuma elata</i> Roxb.                                                                              | ZINGIBERACEAE  | 3 | Roots               | Grind          | Poultices                 | Hand/finger symptom/complaint, Knee symptom/complaint               | [2,5]    |
| <i>Curcuma longa</i> L.                                                                                 | ZINGIBERACEAE  | 1 | Roots               | Burning, grind | Poultices                 | Fracture: other, Leg/thigh symptom/complaint                        | [11]     |
| <i>Curcuma zedoaria</i>                                                                                 | ZINGIBERACEAE  | 1 | Roots               | None           | Chewing                   | Back symptom/complaint, Flank/axilla                                | [6]      |

|                                                          |                |   |                     |                        |                                          |                                     |                   |  |
|----------------------------------------------------------|----------------|---|---------------------|------------------------|------------------------------------------|-------------------------------------|-------------------|--|
| (Christm.)<br>Roscoe                                     |                |   |                     |                        |                                          |                                     | symptom/complaint |  |
| <i>Cuscuta chinensis</i> Lam.                            | CONVOLVULACEAE | 1 | Stems               | Decoction              | Oral ingestion                           | Muscle pain                         | [2]               |  |
| <i>Cyclocodon celebicus</i> (Blume) D.Y. Hong            | CAMPANULACEAE  | 1 | Roots               | Decoction              | Oral ingestion                           | Muscle pain                         | [6]               |  |
| <i>Cymbopogon citratus</i> (DC.) Stapf                   | POACEAE        | 2 | Stems, whole plants | Burning, grind         | Poultices                                | Fracture: other, Muscle pain        | [2,5]             |  |
| <i>Dendrocalamus brandisii</i> (Munro) Kurz              | POACEAE        | 1 | Roots               | Decoction              | Oral ingestion                           | Muscle pain                         | [5]               |  |
| <i>Dendrophthoe pentandra</i> (L.) Miq.                  | LORANTHACEAE   | 1 | Stems               | Decoction              | Oral ingestion                           | Knee symptom/complaint              | [1]               |  |
| <i>Desmos macrocarpus</i> Bân                            | ANNONACEAE     | 1 | Roots               | Decoction              | Oral ingestion                           | Muscle pain                         | [2]               |  |
| <i>Dimetia ampliflora</i> (Hance) Neupane and N. Wikstr. | RUBIACEAE      | 1 | Roots, whole plants | Decoction              | Oral ingestion, steaming                 | Muscle pain                         | [6]               |  |
| <i>Diplazium esculentum</i> (Retz.) Sw.                  | ATHYRIACEAE    | 1 | Roots               | Decoction              | Poultices                                | Sprain/strain of joint NOS          | [2]               |  |
| <i>Dischidia nummularia</i> R. Br.                       | APOCYNACEAE    | 2 | Leaves              | Decoction, grind, none | Eaten as food, oral ingestion, poultices | Knee symptom/complaint, Muscle pain | [3,7]             |  |
| <i>Dracaena fragrans</i> (L.) Ker Gawl.                  | ASPARAGACEAE   | 1 | Leaves              | Burning                | Poultices                                | Sprain/strain of joint NOS          | [1]               |  |

|                                                                 |              |   |                               |                           |                                     |                                                                                              |             |
|-----------------------------------------------------------------|--------------|---|-------------------------------|---------------------------|-------------------------------------|----------------------------------------------------------------------------------------------|-------------|
| <i>Dracaena terniflora</i> Roxb.                                | ASPARAGACEAE | 1 | Leaves, stems                 | Decoction                 | Oral ingestion                      | Muscle pain                                                                                  | [2]         |
| <i>Duabanga grandiflora</i> (DC.) Walp.                         | LYTHRACEAE   | 2 | Bark                          | Decoction                 | Oral ingestion                      | Muscle pain                                                                                  | [2,5]       |
| <i>Dufrenoya collettii</i> (Gamble) Stauffer                    | SANTALACEAE  | 1 | Roots, whole plants           | Decoction                 | Liniment, oral ingestion, poultices | Flank/axilla symptom/complaint, Muscle pain, Sprain/strain of joint NOS                      | [6]         |
| <i>Dufrenoya sessilis</i> (Craib) Stauffer                      | SANTALACEAE  | 1 | Leaves, stems                 | Burning, decoction        | Oral ingestion, poultices           | Leg/thigh symptom/complaint, Muscle pain, Sprain/strain of joint NOS                         | [2]         |
| <i>Duhaldea cappa</i> (Buch.-Ham. ex D. Don) Pruski and Anderb. | ASTERACEAE   | 7 | Inflorescences, leaves, roots | Burning, decoction, grind | Oral ingestion, poultices           | Joint symptom/complaint NOS, Knee symptom/complaint, Muscle pain, Sprain/strain of joint NOS | [3,6,7]     |
| <i>Elephantopus scaber</i> L.                                   | ASTERACEAE   | 6 | Roots, whole plants           | Decoction                 | Oral ingestion                      | Flank/axilla symptom/complaint, Muscle pain                                                  | [1,2,3,5,6] |
| <i>Eleutherine bulbosa</i> (Mill.) Urb.                         | IRIDACEAE    | 1 | Roots                         | Grind                     | Liniment                            | Muscle pain                                                                                  | [5]         |
| <i>Embelia ribes</i> Burm.f.                                    | PRIMULACEAE  | 1 | Roots                         | Decoction                 | Oral ingestion                      | Muscle pain                                                                                  | [6]         |
| <i>Engelhardia spicata</i> Lesch. ex Blume                      | JUGLANDACEAE | 2 | Bark, stems                   | Decoction                 | Oral ingestion                      | Muscle pain                                                                                  | [1,7]       |
| <i>Ensete glaucum</i> (Roxb.) Cheesman                          | MUSACEAE     | 1 | Seeds                         | Decoction                 | Compress                            | Muscle pain                                                                                  | [1]         |

|                                                                                               |                     |   |                             |                       |                                          |                                                                 |                 |
|-----------------------------------------------------------------------------------------------|---------------------|---|-----------------------------|-----------------------|------------------------------------------|-----------------------------------------------------------------|-----------------|
| <i>Equisetum ramosissimum</i><br>Desf. subsp.<br><i>debile</i> (Roxb. ex<br>Vaucher)<br>Hauke | EQUISETACEAE        | 1 | Stems                       | Decoction             | Oral<br>ingestion                        | Muscle pain                                                     | [7]             |
| <i>Erythrina subumbrans</i><br>(Hassk.) Merr.                                                 | LEGUMINOSAE         | 2 | Bark, leaves                | Burning,<br>decoction | Oral<br>ingestion,<br>poultices          | Fracture:<br>radius/ulna,<br>Leg/thigh<br>symptom/compla<br>int | [2,9]           |
| <i>Eurycoma longifolia</i> Jack                                                               | SIMAROUBACEAE       | 2 | Whole<br>plants             | Decoction             | Oral<br>ingestion                        | Muscle pain                                                     | [7]             |
| <i>Ficus semicordata</i><br>Buch.-Ham. ex<br>Sm.                                              | MORACEAE            | 1 | Stems                       | Decoction             | Oral<br>ingestion                        | Muscle pain                                                     | [8]             |
| <i>Flacourtia jangomas</i><br>(Lour.)<br>Raeusch.                                             | SALICACEAE          | 1 | Bark                        | Decoction             | Oral<br>ingestion                        | Muscle pain                                                     | [1]             |
| <i>Flacourtia rukam</i><br>Zoll. and<br>Moritzi                                               | SALICACEAE          | 2 | Roots                       | Decoction             | Oral<br>ingestion                        | Bursitis/tendinitis<br>/synovitis NOS,<br>Muscle pain           | [5]             |
| <i>Flemingia strobilifera</i> (L.)<br>W.T. Aiton                                              | LEGUMINOSAE         | 1 | Roots                       | Decoction             | Oral<br>ingestion                        | Muscle pain                                                     | [6]             |
| <i>Flueggea leucopyrus</i><br>Willd.                                                          | PHYLLANTHACEAE<br>E | 1 | Roots                       | Decoction             | Oral<br>ingestion                        | Muscle pain                                                     | [6]             |
| <i>Gmelina arborea</i><br>Roxb.                                                               | LAMIACEAE           | 8 | Bark,<br>inflorescence<br>s | Burning,<br>decoction | Oral<br>ingestion,<br>poultices,<br>soak | Fracture: other,<br>Knee<br>symptom/compla<br>int, Muscle pain  | [3,4,5,6,<br>7] |
| <i>Gynostemma pentaphyllum</i>                                                                | CUCURBITACEAE       | 1 | Whole<br>plants             | Decoction             | Poultices                                | Muscle pain                                                     | [6]             |



|                                                                                   |               |   |                      |                 |                               |                                                                     |       |  |
|-----------------------------------------------------------------------------------|---------------|---|----------------------|-----------------|-------------------------------|---------------------------------------------------------------------|-------|--|
| (Thunb.)<br>Makino                                                                |               |   |                      |                 |                               |                                                                     |       |  |
| <i>Heliciopsis terminalis</i><br>(Kurz) Sleumer                                   | PROTEACEAE    | 1 | Bark                 | Decoction       | Oral ingestion                | Muscle pain                                                         | [7]   |  |
| <i>Hellenia speciosa</i><br>(J. Koenig) S.R. Dutta                                | COSTACEAE     | 1 | Roots                | Decoction       | Oral ingestion                | Flank/axilla symptom/complaint                                      | [4]   |  |
| <i>Hiptage benghalensis</i> (L.) Kurz                                             | MALPIGHIACEAE | 1 | Bark, roots, stems   | Decoction       | Oral ingestion                | Back symptom/complaint, Flank/axilla symptom/complaint, Muscle pain | [5]   |  |
| <i>Hiptage benghalensis</i> (L.) Kurz subsp. <i>candicans</i> (Hook.f.) Sirirugsa | MALPIGHIACEAE | 2 | Bark                 | Decoction       | Oral ingestion                | Flank/axilla symptom/complaint                                      | [1,5] |  |
| <i>Huangtcia renifolia</i> (L.) H. Ohashi and K. Ohashi                           | LEGUMINOSAE   | 1 | Whole plants         | Decoction       | Oral ingestion                | Muscle pain                                                         | [1]   |  |
| <i>Hydrocotyle javanica</i> Thunb.                                                | ARALIACEAE    | 2 | Leaves, whole plants | Decoction, none | Eaten as food, oral ingestion | Back symptom/complaint, Flank/axilla symptom/complaint, Muscle pain | [2,6] |  |
| <i>Hymenasplenium apogamum</i> (N. Murak. and Hatan.) Nakaike                     | ASPLENIACEAE  | 1 | Leaves               | Burning         | Poultices                     | Sprain/strain of ankle                                              | [2]   |  |
| <i>Illigera trifoliata</i> (Griff.) Dunn                                          | HERNANDIACEAE | 1 | Leaves, whole plants | Decoction       | Oral ingestion, steaming      | Muscle pain                                                         | [6]   |  |

|                                                                                         |               |   |                                         |           |                   |                                                                                                          |               |
|-----------------------------------------------------------------------------------------|---------------|---|-----------------------------------------|-----------|-------------------|----------------------------------------------------------------------------------------------------------|---------------|
| <i>Imperata<br/>cylindrica</i> (L.)<br>Raeusch.                                         | POACEAE       | 1 | Roots                                   | Decoction | Oral<br>ingestion | Back<br>symptom/compla<br>int, Flank/axilla<br>symptom/compla<br>int                                     | [6]           |
| <i>Indigofera<br/>caloneura</i> Kurz                                                    | LEGUMINOSAE   | 1 | Whole<br>plants                         | Decoction | Oral<br>ingestion | Knee<br>symptom/compla<br>int                                                                            | [3]           |
| <i>Ixora henryi</i> H.<br>Lév.                                                          | RUBIACEAE     | 1 | Leaves                                  | Decoction | Oral<br>ingestion | Muscle pain                                                                                              | [2]           |
| <i>Kaempferia<br/>rotunda</i> L.                                                        | ZINGIBERACEAE | 1 | Roots                                   | Grind     | Compress          | Muscle pain,<br>Knee<br>symptom/compla<br>int                                                            | [1]           |
| <i>Leea indica</i><br>(Burm.f.) Merr.                                                   | VITACEAE      | 2 | Leaves, roots                           | Decoction | Oral<br>ingestion | Knee<br>symptom/compla<br>int                                                                            | [5,12]        |
| <i>Lilium<br/>primulinum</i><br>Baker var.<br><i>burmanicum</i><br>(W.W. Sm.)<br>Stearn | LILIACEAE     | 1 | Roots                                   | Decoction | Bath              | Back<br>symptom/compla<br>int, Flank/axilla<br>symptom/compla<br>int                                     | [3]           |
| <i>Litsea<br/>martabanica</i><br>(Kurz) Hook.f.                                         | LAURACEAE     | 1 | Whole<br>plants                         | Decoction | Oral<br>ingestion | Muscle pain                                                                                              | [6]           |
| <i>Lycopodiella<br/>cernua</i> cernua<br>(L.) Pic. Serm.                                | LYCOPODIACEAE | 1 | Stems                                   | Decoction | Oral<br>ingestion | Muscle pain                                                                                              | [5]           |
| <i>Lygodium<br/>flexuosum</i> (L.)<br>Sw.                                               | LYGODIACEAE   | 4 | Aerial parts,<br>roots, whole<br>plants | Decoction | Oral<br>ingestion | Back<br>symptom/compla<br>int, Flank/axilla<br>symptom/compla<br>int, Leg/thigh<br>symptom/compla<br>int | [6,13,14<br>] |

|                                                             |                 |   |                            |                               |                 |                                                                                   |       |
|-------------------------------------------------------------|-----------------|---|----------------------------|-------------------------------|-----------------|-----------------------------------------------------------------------------------|-------|
| <i>Macaranga denticulata</i> (Blume) Müll. Arg.             | EUPHORBIACEAE   | 1 | Roots                      | Decoction                     | Oral ingestion  | Fracture: femur                                                                   | [2]   |
| <i>Maesa glomerata</i> K. Larsen and C.M. Hu                | PRIMULACEAE     | 1 | Roots                      | Decoction                     | Oral ingestion  | Muscle pain                                                                       | [6]   |
| <i>Mangifera indica</i> L.                                  | ANACARDIACEAE   | 1 | Stems                      | Decoction                     | Oral ingestion  | Muscle pain                                                                       | [2]   |
| <i>Mansoa alliacea</i> (Lam.) A. Gentry                     | BIGNONIACEAE    | 1 | Leaves                     | Decoction                     | Oral ingestion  | Joint symptom/complaint NOS                                                       | [10]  |
| <i>Melicope lunu-ankenda</i> (Gaertn.) T.G. Hartley         | RUTACEAE        | 1 | Leaves, whole plants       | Decoction, none               | Bath, poultices | Back symptom/complaint, Flank/axilla symptom/complaint, Muscle pain               | [7]   |
| <i>Melicope pteleifolia</i> (Champ. ex Benth.) T.G. Hartley | RUTACEAE        | 1 | Roots                      | Decoction                     | Oral ingestion  | Muscle pain                                                                       | [6]   |
| <i>Memecylon pauciflorum</i> Blume                          | MELASTOMATACEAE | 1 | Leaves                     | Decoction                     | Oral ingestion  | Muscle pain                                                                       | [2]   |
| <i>Microcos paniculata</i> L.                               | MALVACEAE       | 1 | Leaves, roots              | Decoction                     | Oral ingestion  | Muscle pain                                                                       | [6]   |
| <i>Miliusa thorelii</i> Finet and Gagnep.                   | ANNONACEAE      | 7 | Bark, leaves, roots, stems | Alcoholic infusion, decoction | Oral ingestion  | Fracture: other, Joint symptom/complaint NOS, Knee symptom/complaint, Muscle pain | [3,7] |
| <i>Miliusa velutina</i> (Dunal) Hook.f. and Thomson         | ANNONACEAE      | 1 | Roots                      | Decoction                     | Oral ingestion  | Back symptom/complaint, Flank/axilla                                              | [9]   |

|                                                          |                     |   |                            |                 |                         |                                             |         |
|----------------------------------------------------------|---------------------|---|----------------------------|-----------------|-------------------------|---------------------------------------------|---------|
|                                                          |                     |   |                            |                 |                         | symptom/complaint                           |         |
| <i>Mimosa pudica</i> L.                                  | LEGUMINOSAE         | 3 | Roots, whole plants        | Decoction       | Oral ingestion, soak    | Muscle pain                                 | [2,6,7] |
| <i>Mitragyna rotundifolia</i> (Roxb.) Kuntze             | RUBIACEAE           | 1 | Roots, stems               | Decoction       | Oral ingestion          | Rheumatoid/sero positive arthritis          | [4]     |
| <i>Momordica charantia</i> L.                            | CUCURBITACEAE       | 1 | Whole plants               | Cook            | Eaten as food           | Muscle pain                                 | [6]     |
| <i>Monosis volkameriifolia</i> (DC.) H. Rob. and Skvarla | ASTERACEAE          | 1 | Roots, stems               | Decoction       | Oral ingestion          | Leg/thigh symptom/complaint, Muscle pain    | [5]     |
| <i>Mussaenda sanderiana</i> Ridl.                        | RUBIACEAE           | 1 | Roots                      | Decoction       | Poultices               | Muscle pain                                 | [7]     |
| <i>Nyctocalos brunfelsiiflora</i> Teijsm. and Binn.      | BIGNONIACEAE        | 1 | Roots, stems, whole plants | Decoction       | Oral ingestion          | Flank/axilla symptom/complaint, Muscle pain | [6]     |
| <i>Oenanthe javanica</i> (Blume) DC.                     | APIACEAE            | 1 | Leaves                     | None            | Eaten as food           | Muscle pain                                 | [2]     |
| <i>Oroxylum indicum</i> (L.) Benth. ex Kurz              | BIGNONIACEAE        | 2 | Bark, stems                | Decoction, none | Chewing, oral ingestion | Muscle pain                                 | [2,6]   |
| <i>Orthosiphon aristatus</i> (Blume) Miq.                | LAMIACEAE           | 1 | Roots                      | Decoction       | Oral ingestion          | Muscle pain                                 | [8]     |
| <i>Osbeckia chinensis</i> L.                             | MELASTOMATA<br>CEAE | 1 | Roots, whole plants        | Decoction       | Oral ingestion          | Muscle pain                                 | [6]     |
| <i>Oxyceros bispinosus</i> (Griff.) Tirveng.             | RUBIACEAE           | 1 | Stems                      | Decoction       | Oral ingestion          | Muscle pain                                 | [8]     |

|                                                          |                    |   |                                             |                                     |                                |                                                                      |       |
|----------------------------------------------------------|--------------------|---|---------------------------------------------|-------------------------------------|--------------------------------|----------------------------------------------------------------------|-------|
| <i>Paris polyphylla</i><br>Sm.                           | MELANTHIACEAE      | 2 | Roots                                       | Alcoholic<br>infusion,<br>decoction | Oral<br>ingestion              | Flank/axilla<br>symptom/compl<br>aint, Muscle pain                   | [3]   |
| <i>Peliosanthes<br/>caesia</i> J.M.H.<br>Shaw            | ASPARAGACEAE       | 1 | Leaves,<br>whole plants                     | Decoction                           | Oral<br>ingestion              | Neck<br>symptom/compl<br>aint                                        | [6]   |
| <i>Phlogacanthus<br/>curviflorus</i> Nees                | ACANTHACEAE        | 2 | Inflorescence<br>s, leaves,<br>whole plants | Burning,<br>none                    | Eaten as<br>food,<br>poultices | Muscle pain                                                          | [6,9] |
| <i>Phyllanthus<br/>amarus</i><br>Schumach. and<br>Thonn. | PHYLLANTHACEA<br>E | 1 | Whole<br>plants                             | Decoction                           | Oral<br>ingestion              | Muscle pain                                                          | [2]   |
| <i>Phyllanthus<br/>emblica</i> L.                        | PHYLLANTHACEA<br>E | 3 | Bark                                        | Decoction                           | Oral<br>ingestion              | Muscle pain                                                          | [9,8] |
| <i>Phyllodium<br/>pulchellum</i> (L.)<br>Desv.           | LEGUMINOSAE        | 2 | Roots, whole<br>plants                      | Decoction                           | Oral<br>ingestion              | Muscle pain                                                          | [1,7] |
| <i>Picrasma<br/>javanica</i> Blume                       | SIMAROUBACEAE      | 1 | Bark                                        | Water<br>infusion                   | Oral<br>ingestion              | Muscle pain                                                          | [6]   |
| <i>Piper<br/>boehmeriifolium</i><br>(Miq.) C. DC.        | PIPERACEAE         | 1 | Roots                                       | Decoction                           | Oral<br>ingestion              | Muscle pain                                                          | [2]   |
| <i>Piper<br/>interruptum</i><br>Opiz                     | PIPERACEAE         | 2 | Stems                                       | Decoction                           | Oral<br>ingestion              | Muscle pain                                                          | [1]   |
| <i>Piper nigrum</i> L.                                   | PIPERACEAE         | 1 | Infructescen<br>ces                         | Decoction                           | Oral<br>ingestion              | Back<br>symptom/compl<br>aint, Flank/axilla<br>symptom/compl<br>aint | [5]   |
| <i>Piper<br/>retrofractum</i><br>Vahl                    | PIPERACEAE         | 1 | Infructescen<br>ces                         | Decoction                           | Oral<br>ingestion              | Back<br>symptom/compl<br>aint, Flank/axilla<br>symptom/compl<br>aint | [5]   |

|                                                     |                |    |                                   |                                                      |                                                                |                                                                                                                                                                                                                              |                     |
|-----------------------------------------------------|----------------|----|-----------------------------------|------------------------------------------------------|----------------------------------------------------------------|------------------------------------------------------------------------------------------------------------------------------------------------------------------------------------------------------------------------------|---------------------|
| <i>Piper ribesoides</i><br>(Wall.) C. DC            | PIPERACEAE     | 1  | Stems                             | Grind                                                | Oral<br>ingestion                                              | Muscle pain                                                                                                                                                                                                                  | [5]                 |
| <i>Plantago major</i><br>L.                         | PLANTAGINACEAE | 10 | Leaves,<br>roots, whole<br>plants | Burning,<br>grind,<br>decoction,<br>none,<br>pounded | Compress,<br>eaten as<br>food, oral<br>ingestion,<br>poultices | Back<br>symptom/compl<br>aint, Flank/axilla<br>symptom/compl<br>aint, Hand/finger<br>symptom/compl<br>aint, Joint<br>symptom/compl<br>aint NOS, Knee<br>symptom/compl<br>aint, Muscle pain,<br>Sprain/strain of<br>joint NOS | [3,5,7,9,<br>13,14] |
| <i>Plumbago indica</i><br>L.                        | PLUMBAGINACEAE | 2  | Roots                             | Alcoholic<br>infusion,<br>decoction                  | Oral<br>ingestion                                              | Flank/axilla<br>symptom/compl<br>aint, Knee<br>symptom/compl<br>aint, Muscle pain                                                                                                                                            | [3,9]               |
| <i>Plumbago</i><br><i>zeylanica</i> L.              | PLUMBAGINACEAE | 1  | Roots                             | Alcoholic<br>infusion                                | Oral<br>ingestion                                              | Back<br>symptom/compl<br>aint, Flank/axilla<br>symptom/compl<br>aint                                                                                                                                                         | [3]                 |
| <i>Plumeria obtusa</i><br>L.                        | APOCYNACEAE    | 1  | Leaves                            | Decoction                                            | Oral<br>ingestion                                              | Muscle pain                                                                                                                                                                                                                  | [2]                 |
| <i>Plumeria rubra</i><br>L.                         | APOCYNACEAE    | 1  | Bark                              | Decoction,<br>water<br>infusion                      | Oral<br>ingestion                                              | Muscle pain                                                                                                                                                                                                                  | [6]                 |
| <i>Polygala arillata</i><br>Buch.-Ham. ex<br>D. Don | POLYGALACEAE   | 2  | Inflorescence<br>s, roots         | Decoction                                            | Oral<br>ingestion                                              | Muscle pain                                                                                                                                                                                                                  | [2,12]              |
| <i>Polygala</i><br><i>chinensis</i> L.              | POLYGALACEAE   | 1  | Whole<br>plants                   | Burning,<br>decoction                                | Oral<br>ingestion                                              | Muscle pain                                                                                                                                                                                                                  | [6]                 |

|                                                 |                |    |                                   |                                     |                                 |                                                                                                                     |                                   |
|-------------------------------------------------|----------------|----|-----------------------------------|-------------------------------------|---------------------------------|---------------------------------------------------------------------------------------------------------------------|-----------------------------------|
| <i>Pothos chinensis</i><br>(Raf.) Merr.         | ARACEAE        | 2  | Leaves,<br>stems, whole<br>plants | Decoction                           | Oral<br>ingestion               | Leg/thigh<br>symptom/compla<br>int, Muscle pain                                                                     | [2,6]                             |
| <i>Pothos scandens</i><br>L.                    | ARACEAE        | 7  | Whole<br>plants                   | Alcoholic<br>infusion,<br>decoction | Oral<br>ingestion               | Back<br>symptom/compla<br>int, Flank/axilla<br>symptom/compla<br>int, Muscle pain,<br>Sprain/strain of<br>joint NOS | [3,7]                             |
| <i>Psychotria<br/>yunnanensis</i><br>Hutch.     | RUBIACEAE      | 1  | Stems                             | Decoction                           | Oral<br>ingestion               | Muscle pain                                                                                                         | [2]                               |
| <i>Putranjiva<br/>roxburghii</i> Wall.          | PUTRANJIVACEAE | 1  | Leaves                            | Burning                             | Poultices                       | Muscle pain                                                                                                         | [8]                               |
| <i>Rhinacanthus<br/>nasutus</i> (L.)<br>Kurz    | ACANTHACEAE    | 1  | Whole<br>plants                   | Decoction                           | Oral<br>ingestion               | Muscle pain                                                                                                         | [5]                               |
| <i>Rothea serrata</i><br>Steane and<br>Mabb.    | LAMIACEAE      | 3  | Barks, leaves                     | Decoction,<br>grind                 | Oral<br>ingestion,<br>poultices | Muscle pain                                                                                                         | [4,6,7]                           |
| <i>Rubia cordifolia</i><br>L.                   | RUBIACEAE      | 1  | Whole<br>plants                   | Decoction                           | Oral<br>ingestion               | Muscle pain                                                                                                         | [6]                               |
| <i>Saccharum<br/>officinarum</i> L.             | POACEAE        | 1  | Leaves,<br>stems                  | Decoction                           | Oral<br>ingestion               | Back<br>symptom/compla<br>int, Flank/axilla<br>symptom/compla<br>int                                                | [5]                               |
| <i>Salacia chinensis</i><br>L.                  | CELASTRACEAE   | 1  | Stems                             | Alcoholic<br>infusion               | Oral<br>ingestion               | Muscle pain                                                                                                         | [8]                               |
| <i>Salacia<br/>verrucosa</i> Wight              | CELASTRACEAE   | 2  | Roots                             | Decoction                           | Oral<br>ingestion               | Leg/thigh<br>symptom/compla<br>int, Muscle pain                                                                     | [2,6]                             |
| <i>Sambucus<br/>javanica</i> Reinw.<br>ex Blume | ADOXACEAE      | 16 | Leaves,<br>roots, whole<br>plants | Burning,<br>grind,<br>decoction     | Compress,<br>oral               | Flank/axilla<br>symptom/compla<br>int, Fracture:                                                                    | [2,3,4,6,<br>7,9,12,1<br>3,14,15] |

|                                                                                             |                    |   |                        |                          |                                              |                                                                                                                                                                                           |       |
|---------------------------------------------------------------------------------------------|--------------------|---|------------------------|--------------------------|----------------------------------------------|-------------------------------------------------------------------------------------------------------------------------------------------------------------------------------------------|-------|
|                                                                                             |                    |   |                        |                          | ingestion,<br>poultices                      | other, Fracture:<br>radius/ulna, Joint<br>symptom/compla<br>int NOS,<br>Leg/thigh<br>symptom/compla<br>int, Muscle pain,<br>Sprain/strain of<br>joint NOS, Wrist<br>symptom/compla<br>int |       |
| <i>Sambucus<br/>simpsonii</i><br>Rehder                                                     | ADOXACEAE          | 7 | Leaves, roots          | Burning,<br>decoction    | Compress,<br>oral<br>ingestion,<br>poultices | Fracture: other,<br>Muscle pain,<br>Sprain/strain of<br>joint NOS                                                                                                                         | [1,3] |
| <i>Sarcandra glabra</i><br>(Thunb.) Nakai<br>var.<br><i>brachystachys</i><br>(Blume) Verdc. | CHLORANTHACE<br>AE | 1 | Roots                  | Decoction                | Oral<br>ingestion                            | Muscle pain                                                                                                                                                                               | [6]   |
| <i>Saurauia<br/>roxburghii</i> Wall.                                                        | ACTINIDIACEAE      | 1 | Roots                  | Decoction                | Decoction                                    | Muscle pain                                                                                                                                                                               | [2]   |
| <i>Schefflera<br/>leucantha</i> R.<br>Vig.                                                  | ARALIACEAE         | 4 | Stems,<br>whole plants | Burning and<br>decoction | Bath, oral<br>ingestion                      | Back<br>symptom/compla<br>int, Flank/axilla<br>symptom/compla<br>int, Joint<br>symptom/compla<br>int NOS, Muscle<br>pain                                                                  | [3,8] |
| <i>Schima wallichii</i><br>(DC.) Korth.                                                     | THEACEAE           | 1 | Leaves                 | Water<br>infusion        | Oral<br>ingestion                            | Muscle pain                                                                                                                                                                               | [5]   |
| <i>Scleropyrum<br/>maingayi</i><br>Hook.f.                                                  | SANTALACEAE        | 1 | Whole<br>plants        | Decoction                | Oral<br>ingestion                            | Back<br>symptom/compla<br>int, Flank/axilla<br>symptom/compla                                                                                                                             | [6]   |



|                                               |                |   |                             |                       |                |                                                                         |         |
|-----------------------------------------------|----------------|---|-----------------------------|-----------------------|----------------|-------------------------------------------------------------------------|---------|
|                                               |                |   |                             |                       |                | int, Joint symptom/complaint NOS, Muscle pain                           |         |
| <i>Scleropyrum pentandrum</i> (Dennst.) Mabb. | SANTALACEAE    | 2 | Roots                       | Decoction             | Oral ingestion | Back symptom/complaint, Muscle pain                                     | [2,6]   |
| <i>Scoparia dulcis</i> L.                     | PLANTAGINACEAE | 3 | Whole plants                | Decoction             | Oral ingestion | Muscle pain                                                             | [1,2,6] |
| <i>Senna occidentalis</i> (L.) Link           | LEGUMINOSAE    | 1 | Seeds                       | Burning and decoction | Oral ingestion | Muscle pain                                                             | [1]     |
| <i>Sida acuta</i> Burm.f.                     | MALVACEAE      | 2 | Roots, whole plants         | Decoction             | Oral ingestion | Flank/axilla symptom/complaint, Muscle pain, Sprain/strain of joint NOS | [2,6]   |
| <i>Sida cordifolia</i> L.                     | MALVACEAE      | 1 | Roots                       | Decoction             | Oral ingestion | Flank/axilla symptom/complaint, Muscle pain, Sprain/strain of joint NOS | [6]     |
| <i>Sida rhombifolia</i> L.                    | MALVACEAE      | 1 | Leaves, roots, whole plants | Decoction             | Oral ingestion | Flank/axilla symptom/complaint                                          | [6]     |
| <i>Smilax corbularia</i> Kunth                | SMILACACEAE    | 1 | Roots                       | Decoction             | Oral ingestion | Muscle pain                                                             | [2]     |
| <i>Smilax glabra</i> Roxb.                    | SMILACACEAE    | 2 | Roots                       | Decoction             | Oral ingestion | Back symptom/complaint, Flank/axilla symptom/complaint, Muscle pain     | [2,6]   |
| <i>Smilax griffithii</i> A. DC.               | SMILACACEAE    | 2 | Whole plants                | Decoction             | Oral ingestion | Muscle pain                                                             | [7]     |

|                                                                |             |   |                                    |                               |                |                                                                     |          |
|----------------------------------------------------------------|-------------|---|------------------------------------|-------------------------------|----------------|---------------------------------------------------------------------|----------|
| <i>Smilax luzonensis</i> C. Presl                              | SMILACACEAE | 1 | Roots                              | Decoction                     | Oral ingestion | Muscle pain                                                         | [2]      |
| <i>Sohmaea teres</i> (Wall. ex Benth.) H. Ohashi and K. Ohashi | LEGUMINOSAE | 1 | Roots                              | Decoction                     | Oral ingestion | Back symptom/complaint, Flank/axilla symptom/complaint              | [12]     |
| <i>Solanum erianthum</i> D. Don                                | SOLANACEAE  | 1 | Stems                              | Decoction                     | Oral ingestion | Back symptom/complaint, Flank/axilla symptom/complaint              | [3]      |
| <i>Styrax benzoides</i> Craib                                  | STYRACACEAE | 1 | Roots                              | Decoction                     | Oral ingestion | Muscle pain                                                         | [2]      |
| <i>Tadehagi triquetrum</i> (L.) H. Ohashi                      | LEGUMINOSAE | 3 | Roots, whole plants                | Alcoholic infusion, decoction | Oral ingestion | Back symptom/complaint, Flank/axilla symptom/complaint, Muscle pain | [2,6,12] |
| <i>Tetrastigma cruciatum</i> Craib and Gagnep.                 | VITACEAE    | 1 | Roots                              | Decoction                     | Oral ingestion | Muscle pain                                                         | [6]      |
| <i>Thunbergia coccinea</i> Wall. ex D. Don                     | ACANTHACEAE | 2 | Stems, whole plants                | Decoction                     | Oral ingestion | Arm symptom/complaint, Knee symptom/complaint, Muscle pain          | [2,6]    |
| <i>Thunbergia laurifolia</i> Lindl.                            | ACANTHACEAE | 3 | Leaves, roots, stems, whole plants | Decoction                     | Oral ingestion | Muscle pain                                                         | [2,5,6]  |
| <i>Thysanolaena latifolia</i> (Roxb. ex Hornem.) Honda         | POACEAE     | 1 | Roots                              | Decoction                     | Oral ingestion | Muscle pain                                                         | [2]      |

|                                                                      |                     |   |                        |                                                           |                                 |                                                                                                                          |                |
|----------------------------------------------------------------------|---------------------|---|------------------------|-----------------------------------------------------------|---------------------------------|--------------------------------------------------------------------------------------------------------------------------|----------------|
| <i>Tinospora crispa</i><br>(L.) Hook.f.<br>and Thomson               | MENISPERMACEAE<br>E | 4 | Aerial parts,<br>stems | Alcoholic<br>infusion,<br>sugar<br>infusion,<br>decoction | Oral<br>ingestion,<br>poultices | Back<br>symptom/compl<br>aint, Flank/axilla<br>symptom/compl<br>aint, Muscle pain                                        | [2,6,7,1<br>1] |
| <i>Tupistra<br/>muricata</i><br>(Gagnep.) N.<br>Tanaka               | ASPARAGACEAE        | 2 | Leaves, roots          | Burning,<br>decoction                                     | Poultices                       | Fracture: femur,<br>Leg/thigh<br>symptom/compl<br>aint, Sprain/strain<br>of joint NOS,<br>Wrist<br>symptom/compl<br>aint | [2,6]          |
| <i>Turpinia<br/>pomifera</i> (Roxb.)<br>DC.                          | STAPHYLEACEAE       | 1 | Roots                  | Alcoholic<br>infusion,<br>decoction                       | Oral<br>ingestion               | Muscle pain                                                                                                              | [6]            |
| <i>Uncaria<br/>laevigata</i> Wall.<br>ex G. Don                      | RUBIACEAE           | 1 | Roots                  | Decoction                                                 | Oral<br>ingestion               | Muscle pain                                                                                                              | [2]            |
| <i>Xantolis<br/>burmanica</i><br>(Collett and<br>Hemsl.) P.<br>Royen | SAPOTACEAE          | 1 | Bark                   | Decoction                                                 | Oral<br>ingestion               | Muscle pain                                                                                                              | [6]            |
| <i>Zingiber<br/>latifolium</i><br>Theilade and<br>Mood               | ZINGIBERACEAE       | 1 | Roots                  | Decoction                                                 | Oral<br>ingestion               | Fracture: other                                                                                                          | [3]            |
| <i>Zingiber<br/>officinale</i> Roscoe                                | ZINGIBERACEAE       | 1 | Roots                  | Grind                                                     | Oral<br>ingestion               | Muscle pain                                                                                                              | [5]            |
| <i>Zingiber ottensii</i><br>Valeton                                  | ZINGIBERACEAE       | 2 | Roots                  | Decoction                                                 | Oral<br>ingestion               | Back<br>symptom/compl<br>aint, Flank/axilla<br>symptom/compl<br>aint, Muscle pain                                        | [6,7]          |

|                                           |               |   |       |                      |                   |                                               |        |
|-------------------------------------------|---------------|---|-------|----------------------|-------------------|-----------------------------------------------|--------|
| <i>Zingiber<br/>purpureum</i><br>Roscoe   | ZINGIBERACEAE | 2 | Roots | Concoction,<br>grind | Poultices         | Muscle pain,<br>Sprain/strain of<br>joint NOS | [8,10] |
| <i>Ziziphus<br/>cambodianus</i><br>Pierre | RHAMNACEAE    | 2 | Barks | Decoction            | Oral<br>ingestion | Muscle pain                                   | [1,5]  |

## References

1. Kamwong, K. Ethnobotany of Karens at Ban Mai Sawan and Ban Huay Pu Ling, Ban Luang Sub-District, Chom Thong District, Chiang Mai Province. Master's Thesis, Chiang Mai University, Chiang Mai, Thailand, 2009.
2. Kaewsangsai, S. Ethnobotany of Karen in the Royal Project Extended Area Khun Tuen Noi village, Omkoi district, Chiang Mai province. Master's Thesis, Chiang Mai University, Chiang Mai, Thailand, 2017.
3. Sukkho, T. A Survey of Medicinal Plants Used by Karen People at Ban Chan and Chaem Luang Subdistricts, Mae Chaem District, Master's Thesis, Chiang Mai Province. Chiang Mai University, Chiang Mai, Thailand, 2008.
4. Junsongduang, A. Roles and Importance of Sacred Forest in Biodiversity Conservation in Mae Chaem District, Chiang Mai Province. Doctor of Philosophy, Chiang Mai University, Chiang Mai, Thailand, 2013.
5. Winjchayanan, P. Ethnobotany of Karen in Chiang Mai. Master's Thesis, Chiang Mai University, Chiang Mai, Thailand, 1995.
6. Kantasrila, R. Ehtnobotany of Karen at Ban Wa Do Kro, Mae Song Sub-district, Tha Song Yang District, Tak Province. Master's Thesis, Chiang Mai University, Chiang Mai, Thailand, 2016.
7. Tangjitman, K. Vulnerability prediction of medicinal plants used by Karen people in Chiang Mai province to climatic change using species distribution model (SDM). Doctor of Philosophy, Chiang Mai University, Chiang Mai, Thailand, 2014.
8. Junkhonkaen, J. Ethnobotany of Ban Bowee, Amphoe Suan Phueng, Changwat Ratchaburi. Master's Thesis, Kasetsart University, Bangkok, Thailand, 2012.
9. Pongamornkul, W. An Ethnobotanical Study of the Karen at Ban Yang Pu Toh and Ban Yang Thung Pong, Chiang Dao District, Chiang Mai Province. Master's Thesis, Chiang Mai University, Chiang Mai, Thailand, 2003.
10. Sonsupub, B. Ethnobotany of Karen Community in Raipa Village, Huaykhayeng Subdistrict, Thongphaphume District, Kanchanaburi Province. Master's Thesis, Kasetsart University, Bangkok, Thailand, 2010.
11. Tangjitman, K. Ethnobotany of the Karen at Huay Nam Nak village, Tanaosri subdistrict, Suanphueng district, Ratchaburi province. *Thai J. Bot.* **2017**, 9(2), 253-272.
12. Trisonthi, C.; Trisonthi, P. Ethnobotanical study in Thailand, a case study in Khun Yuam district Maehongson province. *Thai J Bot* **2009**, 1, 1-23.
13. Mahawongsanan, A. Change of Herbal Plants Utilization of the Pga K'nyau: A Case study of Ban Huay Som Poy, Mae Tia Watershed, Chom Thong District, Master's Thesis, Chiang Mai Province. Chiang Mai University, Chiang Mai, Thailand, 2008.
14. Puling, W. Ethnobotany of Karen for studying medicinal plants at Angka Noi and Mae Klangluang villages, Chomthong district, Chiang Mai. B.Sc. Special issue, Chiang Mai University, Chiang Mai, Thailand, 2001.
15. Moonjai, J. Ethnobotany of Ethnic Group in Mae La Noi District, Mae Hong Son Province. Master's Thesis, Chiang Mai University, Chiang Mai, Thailand, 2017.
